# Supplementary material for: Inhibitor-Sensitive FGFR1 Amplification in Human Non-Small Cell Lung Cancer
Source: PLoS One. 2011 Jun 7;6(6):e20351. doi: 10.1371/journal.pone.0020351 (PMC3110189; doi:10.1371/journal.pone.0020351)
Supplement: Table S2 — Amplicons at 8p11-12 overlapping WHSC1L1, LETM2 and FGFR1. (XLS) [file pone.0020351.s009.xls]

## Sheet: Table S2
Table S2: Amplicons at 8p11-12 overlapping WHS1L1, LETM2 and FGFR1
Sample Name	Tumor Type	Sample Type	Amplicon Start (Mb)	Amplicon End (Mb)	Copy Number at FGFR1	Age at Diagnosis	Gender	Pack Years	Reported Ethnicity	Stage	Differentiation
Daffy21T_redo	NSCLC	Primary	38.2842	38.7556	25.2263					1B	M
Daffy94T	Adenocarcinoma	Primary	38.2294	40.4893	25.2263
H1703	SCC	cell_line	35.316	39.7177	21.3906
S004289T	NSCLC	Primary	37.4287	39.1711	19.1744
SM-12Y5	Adenocarcinoma	Primary	37.2553	38.4178	16.9939	60-69	M
SM-11U3	Adenocarcinoma	Primary	38.1438	38.8501	16.7902	50-59	F			1B
Daffy24T	SCC	Primary	38.2842	39.418	15.5591					2B	M
H2444	NSCLC	cell_line	38.0911	38.5612	14.2728
CORL88	NSCLC	cell_line	36.1947	39.7177	13.9827
S004287T	SCC	Primary	38.2294	39.2965	13.5252
SM-11TF	Adenocarcinoma	Primary	37.7706	42.7184	12.9847	60-69	M		AA	2B
Daffy3T	SCC	Primary	38.0937	40.8225	11.5973					1B	M
SM-12VY	Adenocarcinoma	Primary	38.0911	39.0081	11.5251	60-69	F			1B
H520	NSCLC	cell_line	37.2167	39.0081	10.2285
SM-11YE	Adenocarcinoma	Primary	37.7297	39.0575	9.68104	70-79	M	81-90		1A
Daffy40T	SCC	Primary	33.8896	43.7828	9.66619					2B	M
HCC95	SCC	cell_line	34.655	43.5285	9.3028
Daffy57T	SCC	Primary	37.5141	40.8849	8.56725					2B	M
SM-12Y7	Adenocarcinoma	Primary	38.2294	58.5294	8.05374	60-69	F
S004276T	SCC	Primary	36.5995	39.5537	7.53444
BCR-Test-01-045-CP	NSCLC	Primary	37.794	40.1657	7.32601
NCIH1581	Large cell	cell_line	37.5271	38.7062	6.74274
SM-11TW	Adenocarcinoma	Primary	37.4287	39.418	6.52454	40-49	M	21-30	AA
Calu3	NSCLC	cell_line	36.0536	39.0436	6.10303
H1734	NSCLC	cell_line	35.1761	43.7828	6.04944
99-48T	Adenocarcinoma	Primary	38.0911	38.6308	5.77838	76	M	50	J	1A	M
SM-125Q	Adenocarcinoma	Primary	38.1117	39.5537	5.62623	60-69	M		C	1B
H1869	SCC	cell_line	38.2294	43.7828	5.23522
SM-11SV	Adenocarcinoma	Primary	38.363	39.1711	4.76018	80-89	F			1B
Daffy51T	SCC	Primary	37.4532	39.1711	4.6312					2A	P
HCC1359	Large cell	cell_line	35.5704	43.2274	4.50246
Daffy59T	SCC	Primary	35.8576	38.599	4.1415					1B	P
SM-11YD	Adenocarcinoma	Primary	4.6885	40.5941	3.85887	60-69	F	61-70		3A
H2882	NSCLC	cell_line	35.2146	38.611	3.82419
S004356T_02	Adenocarcinoma	Primary	36.4319	39.6418	3.65439
H522	NSCLC	cell_line	35.5209	43.7828	3.62958
Daffy17T	SCC	Primary	37.794	39.2965	3.52968					2A	M
Daffy93T	Adenocarcinoma	Primary	37.4287	43.6395	3.48037
SM-11S5	Adenocarcinoma	Primary	33.4886	146.264	3.43808	70-79	M			1A
SM-125H	Adenocarcinoma	Primary	11.5004	53.2797	3.42743	<40	F		AA	4
Daffy89T	Adenocarcinoma	Primary	31.0895	39.9644	3.39976
2004-12T	Adenocarcinoma	Primary	36.4996	43.1981	3.33863	51	M	60	J	1B	W
Daffy85T	Adenocarcinoma	Primary	37.612	38.955	3.33344
S004343T_02	Adenocarcinoma	Primary	37.8777	43.1982	3.28792
Reported copy number estimates and amplicon positions are based on GLAD-smoothened SNP array data. Samples are ordered by estimated copy number at FGFR1. C, Caucasian; AA, African American; J, Japanese; P, poor differentiation; M, moderate differentiation; W, well differentiation.
