# Supplementary material for: Inhibitor-Sensitive FGFR1 Amplification in Human Non-Small Cell Lung Cancer
Source: PLoS One. 2011 Jun 7;6(6):e20351. doi: 10.1371/journal.pone.0020351 (PMC3110189; doi:10.1371/journal.pone.0020351)
Supplement: Table S3 — Categorization of 628 Primary Samples by 8p11 Amplification Status and Clinical Features. (XLS) [file pone.0020351.s010.xls]

## Sheet: Table S3 
Table S3: Categorization of 628 Primary Samples by 8p11 Amplification Status and Clinical Features
		8p11 Copy Number Status
		Amplified	Diploid
Histology	Adeno	20	535
	Squamous	9	37
	Other	3	24
Differentiation	Well	1	63
	Moderate	7	49
	Poor	3	40
	Undifferentiated	2	1
	Unknown	19	450
Stage	1	11	184
	2	6	70
	3	1	66
	4	1	11
	Unknown	13	263
Age Range at Diagnosis	<40	1	3
	40-49	1	28
	50-59	2	95
	60-69	6	183
	70-79	3	146
	80-89	1	40
	Unknown	18	103
Reported Ethnicity	White	1	67
	African American	3	7
	Japanese	2	106
	Unknown	26	416
